# Supplementary material for: Magnetic Airborne Survey – Geophysical Flight
Source: Copernicus journal article supplement (doi:10.5194/gi-2015-45), 2016-02-02
Supplement: Supplementary file [file gi-2015-45-AC2-supplement.pdf]

1 Magnetic Airborne Survey - Geophysical Flight

2 E. Camara<sup>1</sup>, S.N.P. Guimaraes<sup>2</sup>

3

4 **Author Names**

5 <sup>1</sup>Erick de Barros Camara

6 <sup>2</sup>Suze Nei P. Guimarães

7 **Affiliations**

8 <sup>1</sup>Brucelandair, Ontario, Canada.

9 <sup>2</sup>Prospectors Aerolevantamentos e Sistemas Ltda., Rio de Janeiro, Brazil

10 **Corresponding author:**

11 Erick Camara, ATPL MAGII

12 Rio de Janeiro, Brazil

13 erickcamara@msn.com

14

1 **Abstract**

2 This paper provides a technical review process in the area of aerial  
3 acquisition of geophysical data, with emphasis for magnetometry. Generally  
4 speaking addresses the calibration processes of geophysical equipment and  
5 also the aircraft to minimize possible errors in measurements. The corrections  
6 used in data processing and filtering processes are demonstrated with same  
7 results as well as the evolution of these techniques used in Brazil and  
8 worldwide.

9

10 **Keywords:**

11 Survey, Airborne, geophysics, magnetometry, Data processing.

12

## 1 **1. Introduction**

2 Geophysics is the branch of science that involves the study of Earth via  
3 physical measurements. There are many types of geophysical measurements  
4 that can be made. Airborne geophysics deals with one of them. It uses data  
5 acquired in airborne surveys in assessment of mineral exploration potential  
6 over large areas. Measurements are usually made at an early stage of the  
7 exploration process, which can be of considerable help also in classification  
8 of soil types in the area.

9 The first geophysical method to utilize airborne research was the magnetic  
10 method. Discovered by Faraday, sec. XIX, the method was initially employed by  
11 USSR (currently Russia) in 1936 (Hood, 1969) and adapted later with better  
12 modifications by America in 1940 (Hood, 1969). Both countries had vested  
13 interests in military, technology, particularly for submarine applications. After  
14 some improvements, another early airborne survey was made in the US in 1944  
15 using the Beech Staggerwing NC18575 (Morrison, 2004).

16 The first geophysical airborne survey in Brazil carried out 60 years ago  
17 (1953) in the city of Sao Joao Del Rey, state of Minas Gerais (Hildebrand 2004).  
18 It was conducted by the Prospec Company, which later became Geomag. The  
19 survey utilized both magnetic and radiometric methods. The fixed wing aircraft  
20 PBY-5 (Catalina) was used in the survey. It was equipped with a Fluxgate  
21 magnetometer in the tail of the aircraft, which measured the total magnetic field,  
22 in the tail of the aircraft (Hildebrand 2004). The system was totally analogue  
23 type constructed using electromechanical units and an infinite series of valves.  
24 All the data processing was done manually because, at that time, analogue  
25 data was recorded, tabulated, corrected, interpolated and plotted on a

1 cartographic base. The data were then presented in the form of a profile overlay  
2 on contour maps. All tracing were also manually carried out.

3

4 Figure 1 – Example of the C208B model geophysical acquisition aircraft.

5 (Source: Camara, E. Author Private Collection, Sept 2014).

6

7 The acquisition methods more commonly used in airborne surveys are the  
8 magnetometric and gamma spectrometric methods. Both methods require a  
9 data acquisition at low altitudes to allow the survey to show the study area in  
10 great detail. The acquired data are processed to obtain images or maps of a  
11 region, where the key areas are those with anomalous magnetic fields  
12 (magnetometric case) and radioelement levels (gamma spectrometric case).  
13 The features depicted can then be used to determine intrusions, faults and  
14 lineaments associated with subsurface geology. They can also provide  
15 indications of depth anomalies and possible mineralization areas. Therefore,  
16 these methods has significant economic value, particularly for mineral  
17 exploration.

18 Aerogeophysics technology development has undergone several  
19 cycles over the past five decades. The most important advancement has  
20 been the use of digital technology. However, another massive technological  
21 step was made via the use of navigational systems like satellite positioning  
22 and GPS (Global Positioning System). This technology became available  
23 when the United States government opened their satellite signal GPS to  
24 commercial users in the late 80's (Hildebrand 2004). Consequently, the  
25 development of automatic aeromagnetic compensators, color plotters and  
26 Windows software, such as Geosoft from Oasis Montaj, soon followed.

## 1 **2. Geophysical Method Magnetometry**

2 The magnetometry method measures small intensity variations in the Earth's  
3 magnetic field (Reitz and Milford, 1966). Thus, it measures rocks that exhibit  
4 variable magnetism, which are distributed in the Earth's crust above the Curie  
5 surface (Sordi 2007). These variations are present in different types of  
6 ferromagnetic rocks, including magnetite (mineral magnetic more abundance in  
7 Earth) and basalt. These magnetic materials present in crust terrestrial exhibit  
8 magnetic variations in terrestrial magnetic fields (anomalous magnetic),  
9 magnetically active regions and high terrains (Werner, 1953).

10 Because of these multiple magnetic influences, airborne data must be  
11 validated, and both external and internal influences must be removed from the  
12 data sets. Data removal is conducted using diurnal variation calculus (diurnal  
13 monitoring) and the internal terrestrial magnetic field (based on the International  
14 Geomagnetic Reference Field (IGRF) mathematical model) (Ernesto 1979).

15 The IGRF model is approved by the International Association for  
16 Geomagnetism and Aeronomy (IAGA). It is a group of coefficients developed  
17 using spherical harmonics (Gaussian coefficients and Legendre polynomials),  
18 and is semi-normalized to the 10<sup>th</sup> degree. Every five years, this model  
19 undergoes a recalculation process until a definitive model is developed for the  
20 next 5 years. This definitive model is called the Definitive Geomagnetic  
21 Reference Field (DGRF). The eleventh degree of these equations about the  
22 geomagnetic field model can be related to the spatial dimension of the Earth's  
23 surface magnetic anomalies (Backus et al. 1996). Other books and papers are  
24 dedicated to just these topics and can be using to review and referred (Airo,

1 1999; Barton, 1988; Boyd, 1970; Elo, 1994; Hjelt, 1973; Parkinson, 1983;  
2 Puranen and Puranen, 1977; Reford and Sumner, 1964).

### 3 **3. Air Localization System or Navigation**

4 In the early stages, air navigation for airborne surveys was performed using  
5 an aerial topographic map or aerial photographs and a video camera, which  
6 aided in future planning and management analyses.

7 Now, new and improved equipment is available for geophysics applications.  
8 Since the 1950s, large companies have had access to microwave signal  
9 emitters. Multiple emitters were installed on aircrafts, eventually becoming the  
10 Inertial Navigation System (INS) for large aircrafts. Combined with a gyroscope,  
11 INSs calculate aircraft position.

12 However, the INS has been largely replaced by the GNSS satellite. GNSS  
13 satellites are small, highly precise, relatively cheap, widely available and use  
14 little energy, giving them a distinct advantage over other systems. (Bullock and  
15 Barritt, 1989; Featherstone, 1995; Hakli, 2004; Haugh, 1993).

#### 16 **3.1. GNSS**

17 The GNSS is currently composed of 31 satellites, which operate in orbit.  
18 After 2016, some satellites will provide network measurements. In 2000, the  
19 American government disabled the Selective Availability (SA) filter, which  
20 controls the GPS, resulting in an improved system precision.

21

22 Figure 2 – Natural localization model for satellites in the GNSS system.

23 (Source: "United States Government" Public domain, Official U.S. Government information  
24 about the Global Positioning System (GPS) and related topics 2014.  
25 <http://www.gps.gov/multimedia/images/> - accessed October, 2014.)

26

1 Antennas are arranged to capture two frequencies, but one is reserved for  
2 military use. However, by receiving both signals, the measurement does not  
3 suffer degradation caused by the ionosphere. After 2020, new satellites will  
4 send two civil signals rather than only one.

5

6 Figure 3 – Example of a localization system with Selective Availability (3a)  
7 and Non -Selective Availability (3b). (Source: "United States Government" Public  
8 domain, *Official U.S. Government information about the Global Positioning System (GPS) and*  
9 *related topics* 2014. <http://www.gps.gov/systems/gps/modernization/sa/data/> - accessed  
10 October, 2014).

#### 11 **4. Equipment Used in Geophysical Airborne Surveys**

12 The equipment used in airborne data acquisition includes both on-board and  
13 off-board systems. Acquisition tools are extreme sensitive. However, new and  
14 improved technologies regularly become available.

15 On-board systems are known as Stinger Systems and are typically installed  
16 on the tail of the aircraft. The aircraft is then adapted to prevent any materials  
17 from influencing the measurements. For example, when conducting magnetic  
18 measurements, the aircraft is assembled with the least possible number of  
19 metallic substances or surfaces. Sensors are typically installed in the aircraft's  
20 extremes, such as wing tips, so that mechanical or human factors do not affect  
21 the measurements. Pilots must be wary of the performance loss caused by the  
22 addition of sensors to the wing tips as they affect aerodynamics.

23 Systems with off-board equipment typically carry the magnetic sensor, often  
24 called the bird, below the plane. This requires precise flying and a high level of  
25 compensation to attain reliable data.

26



1 The GNSS receptor provides the geographical location of the aircraft based  
2 on a global satellite system. It works as a signal receptor. The real time  
3 corrections have a precision of  $\pm 3$  meters.

4  
5 Figure 6 – Model of satellite signal receptors adapted for geophysical survey  
6 aircrafts. (Source: Modified from Product Drawing. GPS Source  
7 <http://www.gpssource.com/products/search/160>, March 2015).

### 8 **4.3. Altimeter Radar**

9 Altimeter radar is used to measure the height of the system above a terrain.  
10 It is used to maintain a constant height when collecting measurements. Over  
11 rugged terrain, the processor uses the filters to correct for data acquisition  
12 inconsistencies. The system is used to construct terrestrial digital models to  
13 compare with satellite image models, such as the Shuttle Radar Topography  
14 Mission (SRTM).

15  
16 Figure 7 –FreeFlight TRA-3500 Altimeter Radar with a height limit of 2500 ft  
17 (approx. 750 m). (Source: (n.d.) Retrieved November, 4, From  
18 <Http://www.seaerospace.com/terra/tri40.htm>. Reprinted with permission as per email).

### 20 **4.4. Navigation Agnav/FASDAS**

21 Navigation Agnav provides differential GPS corrections in real time, allowing  
22 for accurate knowledge of the aircraft position and simplified navigation.

### 24 **4.5. Input and Data Storage**

1 Data acquisition equipment works as a magnetic processor and  
2 compensator. A common unit is the DAARC 500 from RMS, which is both a  
3 data collector and a recorder. It allows for a simpler operation and can use up to  
4 eight magnetometers with three axes each. The magnetometers are linked to a  
5 32 bit computer and use advanced mathematics to calculate aircraft  
6 interference, axis movements or other factors. Data are visualized in real time  
7 via a liquid crystal screen.

8

9

10 Figure 8 – DAARC 500 in operation. (Source: Camara, E. Author Private Collection,  
11 Sept 2015.)

#### 12 **4.6. Compensation System**

13 The compensation system monitors aircraft movement and magnetic  
14 interference. It is commonly fitted on the Stinger. It instantaneously improves  
15 data due to compensation measurements. One sensor-based compensator  
16 system is the TFM 100- LN from Billingsley Magnetics, which uses a magnetic  
17 flux sensor.

18

19 Figure 9 – RMS DAARC500 Compensation System. (Source: Modified from RMS  
20 2015 Retrieved November, 2015 from <http://www.rmsinst.com/images/DAARC500.jpg>).

#### 21 **4.7. Camera**

22 Cameras are used to record and monitor the flight area. They also help with  
23 processing as they often allow system operators to verify interference after data  
24 collection.

25

### 26 **5. Airborne Surveys: the Initial Calibration Process of Magnetometry**

1 Survey technologies have specific degrees of precision, based on resolution  
2 and other parameters. Therefore, some devices require calibration and  
3 stabilization prior to surveying. Thus, each device used in a survey may require  
4 a specific calibration method.

5 Because the magnetometer is a piece of magnetic equipment, any  
6 ferromagnetic object in the aircraft, including the engine, can directly interfere  
7 with measurements (Hood 1969). However, the sensor layout of the aircraft  
8 should take this into consideration, well as the materials used to build the craft,  
9 which should be non-magnetic. Ferromagnetic materials in the aircraft structure  
10 should undergo a demagnetization process and then remain stagnant for a long  
11 period of time. This is because the airframe can become static and influence  
12 the data acquisition. The calibration and inference compensation of magnetic  
13 equipment are typically conducted on a flight known as an FOM.

## 14 **6. Technical Instructions for calibration flight and tests**

### 15 **6.1. Figure of merit (FOM)**

16 A test flight is conducted to analyze the active magnetism compensation  
17 caused by the aircraft and its components, such as engine accessories, engine  
18 masses, avionics, current generated on the fuselage and other factors. It is  
19 tested in the project area and must include four selected headings North, South  
20 West and East or different headings based on the project. The test must include  
21 a parallel control lines and a production lines, according to the project  
22 guidelines. The sum of the anomalies in the area is received by the  
23 magnetometer when the aircraft performs control movements in all three axes.  
24 These control movements includes a  $\pm 20^\circ$  Roll (Longitudinal), yaw  $\pm 10^\circ$   
25 (Lateral, since it is centered in the vertical axis) and  $\pm 10^\circ$  Pitch (Vertical, since

1 is around a horizontal axis). At altitudes of 3000 ft (914 m) or 4000 ft (1220 m),  
2 the incoming soil variations are typically low so that only the heading and  
3 maneuvers affect the test. The variations are stored in the system and used for  
4 automatic compensation during future data acquisition projects. (Hood 1969)

5 If any change is made to aircraft equipment or any project parameters, a  
6 new FOM flight must be completed.

7

8 Figure 10 - Model of the aircraft maneuvers performed during the FOM test.

9 (Source: Modified from <http://www.thevoredengineers.com/2012/05//the-quadcopter-basics>, free  
10 domain).

11

12 Figure 11 - Example of magnetic field measurement interference caused by  
13 aircraft maneuvers. (Source: Guimarães, S. Author Private Collection, May 2007).

14

## 15 **6.2. Clove-Leaf**

16 The Clove-Leaf flight test shows the degree of change experienced in the  
17 system when the aircraft changes heading during a data acquisition.

18 Generally, this variation should be zero. However, it can be stored and  
19 compensated for throughout the project.

20 The flight is conducted at specified height based on a planned heading and  
21 North-South East-West directions. After initial test flights, new headings can be  
22 determined and flown via the same coordinates.

23

24 Figure 12 - Maneuver model performed by the aircraft in the clove-leaf test.

25 (Source: Modified from [https://www.ibiblio.org/hyperwar/USN/ref/ASW-Convoy/ASW-Convoy-](https://www.ibiblio.org/hyperwar/USN/ref/ASW-Convoy/ASW-Convoy-2.html)  
26 [2.html](https://www.ibiblio.org/hyperwar/USN/ref/ASW-Convoy/ASW-Convoy-2.html), free domain).

27

### 1 **6.3. LAG**

2 This flight test is used for measuring the magnetic field variations in different  
3 acquisition directions using a magnetometer sensor. This test also utilizes radar  
4 altimeter measurements.

5 Generally, an anomalous region (magnetic and density) is selected to verify  
6 data along two acquisition headings, such as a hangar, ship, steel bridge or a  
7 previously determined anomaly. The annotated acquisition time is taken into  
8 account when performing the mapping.

9

10 Figure 13 - LAG test results model applied to magnetic measurements.

11 (Source: Guimarães, S. Author Private Collection, May 2007).

### 12 **6.4. Altimeter Radar**

13 The altimeter radar test is conducted at heights of 200 ft, 330 ft (100 m), 400  
14 ft (121 m), 500 ft (150 m), 600 ft (182 m), 700 ft (213 m) and 800 ft (244 m). For  
15 benchmarking purposes, the 330 ft (100 m) test should be completed three  
16 times.

17 The altimeter radar is important for data acquisition because the elevation  
18 can directly interfere with concentrations count in certain situations. In addition,  
19 barometric equipment may change with pressure and temperature.

### 20 **6.5. Drape**

21 In mountainous regions, a drape (pre-determined flight height) or  
22 relatively flat terrain is recommended for 3D processing. This allows high  
23 mountain surface data to be more easily attained, superimposed and mapped  
24 at a higher quality. In this case, the height flown to acquire the control lines set  
25 the production lines height. This method accounts for the aircraft performance

1 in the flight environment. Each aircraft climbs and descends at different rates  
2 based on size and other factors (Bryant 1997).

3

4 Figure 14 - (a) drape model applied to the acquisition and control lines (b)  
5 topography of the terrain (c) results of an acquisition line flight with drape.

6 (Source: (n.d.) <http://www.terraquest.ca/wp-content/uploads/2014/05/surveycontours.jpg>  
7 Retrieved October, 2014).

8

## 9 **6.6. Contour**

10 Contour flights use the radar altimeter for data acquisition and are best  
11 suited for flat land or sea (Offshore), often by helicopters. The pilot uses the  
12 radar altimeter to maintain a constant height of 300 feet above the ground,  
13 reaching 500 feet if towing a bird (Hood 1969). On terrain with accentuated  
14 topographical variations, this process makes it difficult to maintain the pre-  
15 determined altitude. Climbs and descents are based on the pilot's experience,  
16 which is largely based on the craft, equipment and terrain. Therefore, using  
17 multiple pilots for data acquisition will cause data inconsistencies and require  
18 manual correction.

## 19 **7. Geophysical Measurement Corrections**

### 20 **7.1. Magnetic Field**

21 Magnetometric method corrections are necessary in the acquired  
22 measurements to isolate only the anomalous magnetic field of interest, in this  
23 case, that is the crust magnetic field. Therefore, observations are made during  
24 aerial acquisition of the total magnetic field (external and internal).

#### 25 **7.1.1. Diurnal Magnetic Monitoring - BaseMag**

1 In general, diurnal magnetic monitoring (DMM) uses a ground  
2 magnetometer. This equipment is installed at a fixed position, called BaseMag,  
3 located as far as possible from magnetic interference. It is typically installed at  
4 the airport, at a location outside the pre-determined interference, which aids in  
5 logistical measures and equipment security.

6 It has built-in GPS for synchronization with aerial data acquisition. DMM  
7 takes measurements of the total magnetic field, which includes the main  
8 magnetic field (inside the earth), external interference (magnetic variation of the  
9 sun due to interactions with solar winds) and the crustal magnetic field.

10 These are ad hoc measurements, and in a magnetic interference-free area,  
11 the crustal magnetic field is negligible. Therefore, the IGRF mathematical model  
12 can provide us with values related to the main magnetic field. Thus, monitoring  
13 must be conducted entirely outside the interference zone of the study area.  
14 Note that modern monitoring equipment has a range limit of 27 NM (50 km),  
15 which is decreased during magnetic storms (Reeves 2005).

16

17 Figure 15 - Example of a day monitoring BaseMag station, which measures  
18 the magnetic field in parallel to an airborne geophysical acquisition site. (Source:  
19 Guimarães, S. Author Private Collection, Jan 2015).

20

21 Figure 16 - Example of the diurnal magnetic field curve acquired at a  
22 BaseMag station. (Source: Guimarães, S. Author Private Collection, May 2007).

### 23 **7.1.2. Magnetic Anomalies in the Surface**

24 Magnetic anomalies are varied counts peaks. These peaks may be caused  
25 by railways, power lines, magnetic storms, large metallic masses, ships,  
26 buildings and hangars. In addition, anomalies can be caused by equipment

1 aboard the aircraft that contains chemical substances, which may be detectable  
2 by the instrument. (Hood 1969).

3 These peaks are clearly observed in the data. However, they must not be  
4 confused with magnetic anomalies caused by the subsurface of interest. These  
5 peaks should be filtered and removed from the data sets.

### 6 **7.1.3. Diurnal Variations**

7 During the day, the earth is bombarded with charged magnetic particles via  
8 solar winds. These loads compress from day to night and then expand, causing  
9 regular variations in the magnetic field. Nights are calmer for data acquisition,  
10 but more impractical in certain regions. These variations are monitored via  
11 Basemag.

### 12 **7.1.4. Magnetic Storm**

13 Protons, electrons and accelerated atomic particles are a result of solar  
14 activity and are carried by solar winds, particularly during magnetic storms.  
15 These events can last for minutes or hours and may reach 90 km/h during  
16 geomagnetic storms. In some cases, the atmosphere may take days to  
17 stabilize. They have a larger influence at the earth's magnetic poles, affecting  
18 GNSS signal reception and radio electronic equipment. This causes major  
19 issues for data acquisition.

20 Weather monitoring equipment provides alerts for large storm events.  
21 Generally, monitoring data and forecasts from meteorological research centers  
22 shown are consulted prior to flights. The most common weather study centers  
23 are the National Oceanic & Atmospheric Administration (NOAA), National  
24 Aeronautics and Space Administration (NASA) and their interagency branches.

## 1 **8. Considerations Related to Geophysical Flight**

2 Flights require the extreme attention of the crew. In addition to flying the  
3 aircraft, the pilot must monitor instruments and navigate. The pilot must  
4 simultaneously note the relation of the aircraft to land, cities, airports, air  
5 traffic, animals and other factors.

6 Normal flights follow pre-determined standards, such as the acquisition  
7 speed needed to preserve data resolution. Exceeding this lateral limit (cross  
8 track) can cause an overlap of the perpendicular line, thus creating a gap on the  
9 map.

10 When approaching an obstacle, such as the ground, or simply following the  
11 drape, the pilot must anticipate the aircraft stabilization factors that can affect  
12 the propeller and flight path. When the power lever is increased to accelerate,  
13 the flow of air causes the craft to rise and tend to the left. Conversely, a  
14 decrease in the power level will decrease speed and cause the craft to tend to  
15 the right. This relationship is known as the P-factor, which affects cross  
16 tracking. It is most noticeable in single-engine aircraft. The pilot should be alert  
17 to sudden power lever changes, which could lead to oversteering or  
18 overcompensation.

19

### 20 **8.1. Line interception**

21 The pilot may be given certain control lines to be flown. He may then  
22 consider the distances and degrees that allow the lines to be most efficiently  
23 flown. EG a line on the bow with an NS curve to the right. It begins to curve 1.8  
24 km away, with a stable tilt of 20 to cross the bow at 090. Note that 900 m is the  
25 distance at which the number is lower due to the curve. If it is greater, the pilot

1 can choose to maintain or decrease the ratio by a few degrees. When flying LO  
2 head to cross bow 0 (360), a distance of 900 m is typically considered.

3

4 Figure 17 - Representation of the control and provisional acquisition lines.

5 (Source: Urquhart, W. 2013 Retrieved October, 2014 from  
6 [http://www.geoexplo.com/flight\\_plan.gif](http://www.geoexplo.com/flight_plan.gif). Reprinted with permission as per email)

7

## 8 **8.2. Flight Lines**

9 A study area is divided into a network of lines in the North-South direction,  
10 commonly known as tie lines (cross - control), and East-West direction, known  
11 as control lines. These lines are based on pre-determined requirements. Control  
12 lines may be located every 250 m to 1000 m for precision, whereas control lines  
13 can be spaced anywhere from 5 km to 10 km.

## 14 **8.3. Completing lines**

15 Various lines or line-segments may be flown successfully or unsuccessfully.  
16 These failures can include control lines or cross lines between control lines,  
17 which are most notable lines due to their typically large flight distance.

## 18 **9. Examples of Results**

19 During airborne geophysical acquisitions, it is necessary to conduct data  
20 quality checks. In general, Quality Assessment and Quality Control (QA-QC)  
21 are conducted on all potential methods geophysics and gamma spectrometry,  
22 which are limited by lateral offset and acquisition speed. Parameters that  
23 undergo QA-QC analyses include the magnetic field, temperature, spectrum  
24 range and others. In addition, the acquisition area and control area are  
25 generally broken into grid blocks. Figure 18 illustrates the quality of two types of

1 data acquisition. Figure 18(a) was measured during the 1980's, when  
2 measurement equipment was much less sophisticated. Figure 18(b) was  
3 measured in 2005, with 250 m line spacing and using the latest equipment.  
4 Both refer to the same area, located in the southern portion of Minas Gerais  
5 state, Brazil.

6

7 Figure 18 - (a) Geophysical Brazil Germany Project acquisition (code 1009 -  
8 CPRM, 1980) and (b) area 2 acquisition (Source: Guimarães, S. Author Private  
9 Collection, Nov 2012).

10

11 Although a complete database was unavailable for Figure 18(b), the  
12 observed level of detail is much higher than in Figure 18(a). Note that  
13 developments in the airborne geophysics field have led to exponentially  
14 improved data, in terms of both coverage and quality. These data have allowed  
15 for significant mineral exploration, geological studies and geophysical analysis  
16 in Brazil and across the globe. For example, Figure 19 illustrates a subsurface  
17 map of high resolution aeromagnetic data, where the degree of certainty  
18 decreases as the data resolution increases.

19

20 Figure 19 – Subsurface magnetic Field behavior based on aeromagnetic  
21 data. Location of magnetic sources of interest (Guimarães, Ravat and Hamza 2014).

22

23 Others studies show results of these evolution process of the airborne  
24 data geophysical acquisition, can cite a few examples in the scientific literature  
25 as: Ravat, 1996; LaBrecque et al., 1997; Brozena et al., 2002 and 2003; Finn

1 and Morgan, 2002; Salem and Ravat, 2003; Hinze et al., 2005; Hemant et al.,  
2 2007; Bouligand et al., 2014; Guimaraes et al., 2014.

3

## 1 **10. Final Considerations**

2 Increased geological knowledge and the development of new  
3 technologies, especially within information technology, have brought about  
4 important advancements in the study of Earth Sciences. The use of sensors  
5 for measuring different physical properties of minerals and rocks in mining  
6 has led to significant data improvements. These advances have allowed  
7 geophysical surveys to become an essential part of mineral exploration and  
8 other fields.

9 The evolution of geophysical equipment and measurement systems has  
10 caused significant improvements in air data acquisition and quality. Thus,  
11 creating improved interpretative maps with economic geology implications has  
12 aided mineral exploration worldwide. This is thanks to improved magnetic field  
13 maps, radiometric, gravity and electromagnetic data, remote sensing and other  
14 data collection and processing methods.

15 This initial work was aimed at creating a summary of acquisition activities,  
16 including equipment and technical operations used to enhance geophysical  
17 measurements and associated results, as well as minimize problems  
18 encountered with these types of measurements.

19

## 1 **References**

- 2 Airo, M.L., 1999. Aeromagnetic and petrophysical investigations applied to  
3 tectonic analysis in the northern Fennoscandian shield. Geol. Survey of  
4 Finland Report of Investigations 145. 51p.
- 5 Backus G., R. Parker, C Constable, (1996) Foundations of Geomagnetism,  
6 Cambridge University Press, pp 369.
- 7 Barton, C.E., 1988. Global and regional geomagnetic reference fields.  
8 Exploration Geophysics. Vol. 19(3), pp. 401-415.
- 9 Bouligand, C., Glen, J. M., & Blakely, R. J. 2014. Distribution of buried  
10 hydrothermal alteration deduced from high resolution magnetic surveys  
11 in Yellowstone National Park. Journal of Geophysical Research: Solid  
12 Earth, 119(4), 2595-2630.
- 13 Boyd, D., 1970. The contribution of airborne magnetic survey to geological  
14 mapping. Pp.213-227 in Mining and Groundwater Geophysics, 1967, ed.  
15 Morley. Geological survey of Canada, Economic Geology Report 26,  
16 Ottawa.
- 17 Brozena, J. M., Childers, V. A., Lawver, L. A., Forsberg, R., Faleide, J., &  
18 Eldholm, O. 2002. A New Aerogeophysical Study of the Eurasia Basin  
19 and Lomonosov Ridge: Implications for Basin Development. In AGU Fall  
20 Meeting Abstracts (Vol. 1, p. 01).
- 21 Brozena, J. M., Childers, V. A., Lawver, L. A., Gahagan, L. M., Forsberg, R.,  
22 Faleide, J. I., & Eldholm, O. 2003. New aerogeophysical study of the  
23 Eurasia Basin and Lomonosov Ridge: Implications for basin  
24 development. Geology, 31(9), 825-828.

- 1 Bryant J., Coffin B., Ferguson S., Imaray M. 1997. Horizontal and vertical  
2 guidance for airborne geophysics. Canadian Aeronautics and Space  
3 Journal 43, 1-134.
- 4 Bullock, S.J., and Barrit, S.D., 1989. Real-Time Navigation and Flight Path  
5 Recovery of Aerial Geophysical survey: A Review. Proceedings of  
6 Exploration '87: Third Decennial International Conference on  
7 Geophysical and Geochemical Exploration for Minerals and  
8 Groundwater. pp.170-182.
- 9 Elo, S., 1994. Geophysical investigation of terrestrial impact craters.In:  
10 Montanari, A. and Smit, J. Post-Ostersund Newsletter. Strasbourg:  
11 European Science Foundation, 2-4.
- 12 Ernesto M., Hiodo F.Y., Pacca I.G. 1979. Estudo Paleomagnetico de Sequencia  
13 de Derrames Basalticos da Formacao Serra Geral Em Santa Catarina.  
14 Anais da Academia Brasileira de Ciências 51, 327-333.
- 15 Featherstone, W.E., 1995. The Global Positioning System (GPS) and its use in  
16 geophysical exploration. Exploration Geophysics (26-1). pp.1-18.
- 17 Finn, C. A. and Morgan L.A. 2002 High-resolution aeromagnetic mapping of  
18 volcanic terrain, Yellowstone National Park. Journal of Volcanology and  
19 Geothermal Research 115.1. pp.207-231.
- 20 Gabell A.H., Tuckett H., Olson D. 2004. The GT-1A mobile gravimeter,  
21 Australian SEG Airborne Gravity Workshop.
- 22 Grasty, R.L., Smith, S.J. and Minty, B.R.S., 1997. Development in the  
23 Standardization and Analysis of Airborne Gamma-Ray Data.  
24 Proceedings of Exploration 97. Fourth Decennial International  
25 Conference on Mineral Exploration. pp.725-731.

- 1 Guimarães S.N.P., Ravat D., Hamza V.M. 2014. Combined use of the centroid  
2 and matched filtering spectral magnetic methods in determining  
3 thermomagnetic characteristics of the crust in the structural provinces of  
4 Central Brazil. *Tectonophysics* 624-625, pp.87-99.
- 5 Gunn, P., 1997. Thematic Issue: Airborne magnetic and radiometric survey.  
6 *AGSO Journal of Australian Geology & Geophysics* (17-2). 216pp.
- 7 Hakli, P., 2004. Practical test on accuracy and usability of Virtual Reference  
8 Sation method in Finland. *Anais FIG Working Week 2004*.
- 9 Haugh, A., 1993. DGPS, Doppler, datums and discrepancies – your positions  
10 explained. *First Break* (11-11). pp.485-488.
- 11 Hemant, K., Thébault, E., Mandeau, M., Ravat, D., & Maus, S. 2007. Magnetic  
12 anomaly map of the world: merging satellite, airborne, marine and  
13 ground-based magnetic data sets. *Earth and Planetary Science  
14 Letters*,260(1), pp.56-71.
- 15 Hildebrand, J. D., 2004, *Aerogeofísica no Brasil e a Evolução das Tecnologias  
16 nos Últimos 50 anos*, I Simpósio de Geofísica da SBGf, pp. 1-8.
- 17 Hinze, W. J., Aiken, C., Brozena, J., Coakley, B., Dater, D., Flanagan, G. and  
18 Kucks, R. 2005. New standards for reducing gravity data: The North  
19 American gravity database. *Geophysics*, 70(4), pp.J25-J32.
- 20 Hjelt, S.E., 1973. Experiences with automatic magnetic interpretation using the  
21 thick plate model. *Geophysical Prospecting* (21), pp.243-265.
- 22 Hovgaard, J. and Grasty, R.L., 1997. Reducing Statistical Noise in Airborne  
23 Gamma-Ray Data Thourgh spectral Component Analysis. *Proceedings  
24 of Exploration 97. Fourth Decennial International Conference on Mineral  
25 Exploration*, edited by A.G.Gubins, GEO F/X, 1068 p. pp.753-763.

- 1 Hurt H.H. Jr. 1965. NAVAIR 00-80T-80, aerodynamics for naval aviators. Naval  
2 Air Systems Command.
- 3 International Arts and Entertainment Alliance. 2013. Advances in airborne and  
4 ground geophysical methods for uranium exploration. International  
5 Atomic Energy Agency, Vienna.
- 6 International Atomic Energy Agency. 2003. Guidelines for radioelement  
7 mapping using gamma ray spectrometry data., Vienna.173pp.
- 8 International Atomic Energy Agency. 1976. Radiometric Reporting Methods and  
9 Calibration in Uranium Exploration. Technical Report Series (174). 57pp.
- 10 LaBrecque, J.L., and Ghidella. M.E., 1997. Bathymetry, depth to magnetic  
11 basement, and sediment thickness estimates from aerogeophysical data  
12 over the western Weddell Basin. Journal of Geophysical Research: Solid  
13 Earth (1978–2012) 102.B4.pp. 7929-7945.
- 14 Morrison, Doug, 2004. Australian Society of Exploration Geophysicists. Preview  
15 Journal Issue 109, pp. 14.
- 16 Packard, M., & Varian, R. (1954, January). Free nuclear induction in the earth's  
17 magnetic field. In Physical Review (Vol. 93, No. 4, pp. 941-941). One  
18 Physics Ellipse, College PK, MD 20740-3844 USA: American Physical  
19 Soc.
- 20 Parkinson, W.D., 1983. Introduction to Geomagnetism. Scottish Academic  
21 Press. Edinburg. 433pp.
- 22 Puranen, M. and Puranen, R., 1977. Apparatus for the measurement of  
23 magnetic susceptibility and its anisotropy. Report of Investigation (28),  
24 Geological Survey of Finland, Espoo. 46pp.
- 25 Ravat, D. 1996. Analysis of the Euler method and its applicability in  
26 environmental magnetic investigations. Journal of Environmental and  
27 Engineering Geophysics, 1(3), 229-238.

- 1 Reeves C. 2005. Aeromagnetic Survey: Principles, Practice, and Interpretation.  
2 Geosoft, Inc.
- 3 Reford, M.S. and Sumner, J.S., 1964. Aeromagnetism. Geophysics  
4 (29)4.pp.482-516.
- 5 Reitz, J.R. and Milford, F.J., 1966. Foundations of Electromagnetic Theory.  
6 Addison-Wesley, Reading. 387pp.
- 7 Salem, A., and Ravat, D. 2003. A combined analytic signal and Euler method  
8 (AN-EUL) for automatic interpretation of magnetic  
9 data. Geophysics, 68(6), pp.1952-1961.
- 10 Sordi D.A. 2007. Aerogeofísica aplicada à compreensão do sistema de  
11 empurrões da sequência Santa Terezinha de Goiás, Brasil Central. 130  
12 f. Dissertação (Mestrado em Geologia)-Universidade de Brasília.,  
13 Brasília.
- 14 Van Leeuwen, E.H., 2000. BHP develops world first Airborne Gravity  
15 Gradiometer for Mineral Exploration. ASEG Preview (86).
- 16 Ward, S.H., and Hood, P., 1969. Low-frequency airborne electromagnetic  
17 methods. In Advances in Geophysics (13). Academic Press. pp. 41-88.
- 18 Wilford, J.R., Bierwirth, P.N. and Craig, M.A., 1997. Application of Airborne  
19 Gamma-ray spectrometry in soil/Regolith mapping and applied  
20 geomorphology. AGSO Journal (17-2). pp.201-216.
- 21

1 About the authors:

2 Camara, E. is a Chief Pilot employed by geophysical companies who has  
3 conducted geophysical airborne surveys since 2011, including work in  
4 South America, Central Africa and Asia, and was the recipient of Master  
5 Ground Instruction certification in the United States and Master  
6 certification in the Federal Aviation Administration's WINGS program.

7

8 Guimaraes, S.N.P. holds a Geophysics Ph.D. from the National  
9 Observatory/University of Kentucky, has worked with geophysical  
10 airborne analyses since 2006, and has worked on numerous geophysical  
11 projects aimed at unifying and improving potential field data collected via  
12 airborne acquisition using geothermal resources.
